# Supplementary material for: Intramolecular G-quadruplex-hairpin loop structure competition of a GC-rich exon region in the TMPRSS2 gene
Source: Royal Society of Chemistry journal article supplement (doi:10.1039/d1cc05523b), 2021-11-16
Supplement: d1cc05523b1.pdf [file d1cc05523b1.pdf]

## Supporting Information

### **Intramolecular G-quadruplex-hairpin loop structure competition of a GC-rich exon region in the TMPRSS2 gene**

Wataru Sugimoto,<sup>a</sup> Natsuki Kinoshita,<sup>a</sup> Minori Nakata,<sup>a</sup> Tatsuya Ohyama,<sup>b</sup> Hisae Tateishi-Karimata,<sup>b</sup> Takahito Nishikata,<sup>a</sup> Naoki Sugimoto,<sup>a,b</sup> Daisuke Miyoshi\*<sup>a</sup> and Keiko Kawauchi\*<sup>a</sup>

#### **Table of Contents**

Materials and methods

Materials

Fluorescence spectroscopy

Circular dichroism spectroscopy

Transcription assay

Table S1 and S2

Figure S1~ S14

References

## **Materials and methods**

### Materials

All high-pressure liquid chromatography (HPLC)-grade, Oligonucleotide Purification Cartridge (OPC) -grade, desalted-grade DNA strands used in this study were acquired from Eurofins Genomics (Tokyo, Japan) and Thermo Fisher Scientific (Tokyo, Japan) (Table S1). Each oligonucleotide concentration was determined by the absorbance at 260 nm at 95 °C. Extinction coefficients for single-strand DNA were calculated from mono- and dinucleotide data using the nearest-neighbor approximation model [1]. Single strand concentrations of oligonucleotides were measured at 260 nm using a UV-1800 spectrophotometer (Shimadzu Co., Ltd., Kyoto, Japan). Chemical reagents were purchased from Tokyo Chemical Industry Co., Ltd. (Tokyo, Japan) and Wako Pure Chemical Co., Ltd. (Osaka, Japan). All reagents were used without further purification.

### Fluorescence spectroscopy

Fluorescence spectra for 1  $\mu$ M ThT or 1  $\mu$ M NMM in the presence of 0, 1.0, 2.5, 3.0, 10 or 30  $\mu$ M DNA oligonucleotides in 150 mM KCl, 40 mM Tris-HCl (pH 7.2 at 37 °C) and 8 mM MgCl<sub>2</sub> buffer were recorded on a FP-8200 spectrofluorometer (JASCO Co., Ltd., Tokyo, Japan) equipped a JASCO PTC-348 temperature controller with a 0.3 cm  $\times$  0.3 cm quartz cell at 25 °C. Before the measurement, the samples were heated to 93 °C, and then cooled at a rate of -0.5 °C min<sup>-1</sup>. Excitation wavelengths for ThT and NMM were 450 nm and 399 nm, respectively.

### Circular dichroism spectroscopy

CD spectra of DNA oligonucleotides were measured using a J-820 spectropolarimeter (JASCO Co., Ltd., Tokyo, Japan) at 20  $\mu$ M total DNA strand concentration in 150 mM KCl, 40 mM Tris-HCl (pH 7.2 at 37 °C) and 8 mM MgCl<sub>2</sub> buffer. Before the measurement, the samples were heated to 93 °C, and then cooled at a rate of -0.5 °C min<sup>-1</sup>. The spectra at 25 °C were obtained using at least three scans between 200 to 350 nm in a cuvette with a path length of 0.1 cm.

For CD melting experiments, samples were heated from 20°C to 90°C at a rate of 0.5 °C min<sup>-1</sup>. Before the measurements, DNA samples were heated to 93 °C, cooled to 25 °C at a rate of -0.5 °C min<sup>-1</sup>. Then, thermal denaturing behavior was traced at 265 nm and 290 nm. The temperature of the cell holder was regulated by a JASCO PTC-348 temperature controller, and the cuvette-holding chamber and the light source were flushed with a constant stream of dry N<sub>2</sub> gas to avoid condensation of water on the cuvette exterior and generation of O<sub>3</sub> gas.

### Transcription Assays

Each transcription reaction solution contained a 2.5  $\mu$ M DNA template, 150 mM KCl or LiCl, 40 mM Tris-HCl (pH 7.2 at 37 °C), 8 mM MgCl<sub>2</sub>, with or without 10% PEG200. The samples were heated to 93 °C for 5 min, and then cooled -0.5 °C min<sup>-1</sup>. After annealing, 100 units of T7 polymerase was added to final concentrations of NTPs and DTT of 1 mM and 5 mM, respectively.

Each mixture was incubated at 37 °C for 0, 10, 30, 60, 90 or 120 min. Reactions were quenched by incubation with 10 units of DNaseI for 20 min, and then a 10-fold excess volume of transcription stop solution (80 wt% formamide, 10 mM Na<sub>2</sub>EDTA, and 0.01% blue dextran) was added. Each sample was cooled rapidly after heating to 93 °C for 5 min, and then loaded onto a 12% polyacrylamide, 7 M urea gel run at 70 °C.

After electrophoresis, each gel was stained with SYBR Gold (PerkinElmer Life Sciences, Waltham, MA, U.S.A.) and fluorescence was detected with a fluorescence imager (GE Healthcare, FLA-5100, Little Chalfont, U.K.). Band intensities were quantified using ImageJ software distributed by the National Institutes of Health, USA.

Table S1

Table S1. DNA sequences used in this study

| Oligonucleotide        | Sequence (5' → 3')                                                                                                                                               |
|------------------------|------------------------------------------------------------------------------------------------------------------------------------------------------------------|
| WT                     | CCTCCGGGCGGGGCAGGGGGCATCGGCGGGTCCCAGGCGCCCAGGTTCCCC<br>TCCCCAGCCCGGACCCCGAGCCGGGACCC                                                                             |
| MT1                    | CCTCCGGGCGGGGCAGGGGGCATCGGCGGGTCTCAGGCGCTCAGGTTCTCC<br>TCTCCAGCTCGGACTCTGAGCCGGGACTC                                                                             |
| MT2                    | CCTCCGAGCGGAGCAGAAGGCATCGGCGAGTCTCAGGCGCTCAGGTTCTCC<br>TCTCCAGCTCGGACTCTGAGCCGGGACTC                                                                             |
| MT3                    | CCTCCAGACGCGCCAGCGCGCATCAGCGGGTCCCAGGCGCTCAGGTTGCGC<br>TGCGCAGTCTGGACCCCGAGCCGGGACCC                                                                             |
| MT4                    | CCTCGGCGCGCGCCAGCGCGCATCGCGCGGTCCCAGGGCGCCAGGTTGCGC<br>TGCGCAGCGCCGACCCCGAGCCGGGACCC                                                                             |
| Temp-WT<br>(template)  | CCTCCGGGCGGGGCAGGGGGCATCGGCGGGTCCCAGGCGCCCAGGTTCCCC<br>TCCCCAGCCCGGACCCCGAGCCGGGACCCAGAGAGAGCACCGAGCCTAGT<br>TCGTGTCATCTCCTATAGTGAGTCGTATTATATAGTGAGTCGTATTAGTG  |
| Temp-MT1<br>(template) | CCTCCGGGCGGGGCAGGGGGCATCGGCGGGTCTCAGGCGCTCAGGTTCTCC<br>TCTCCAGCTCGGACTCTGAGCCGGGACTCCAGAGAGAGCACCGAGCCTAGT<br>TCGTGTCATCTCCTATAGTGAGTCGTATTATATAGTGAGTCGTATTAGTG |
| Temp-MT2<br>(template) | CCTCCGAGCGGAGCAGAAGGCATCGGCGAGTCTCAGGCGCTCAGGTTCTCC<br>TCTCCAGCTCGGACTCTGAGCCGGGACTCCAGAGAGAGCACCGAGCCTAGT<br>TCGTGTCATCTCCTATAGTGAGTCGTATTATATAGTGAGTCGTATTAGTG |
| Temp-MT3<br>(template) | CCTCCAGACGCGCCAGCGCGCATCAGCGGGTCCCAGGCGCTCAGGTTGCGC<br>TGCGCAGTCTGGACCCCGAGCCGGGACCCAGAGAGAGCACCGAGCCTAGT<br>TCGTGTCATCTCCTATAGTGAGTCGTATTATATAGTGAGTCGTATTAGTG  |
| Temp-MT4<br>(template) | CCTCGGCGCGCGCCAGCGCGCATCGCGCGGTCCCAGGGCGCCAGGTTGCGC<br>TGCGCAGCGCCGACCCCGAGCCGGGACCCAGAGAGAGCACCGAGCCTAGT<br>TCGTGTCATCTCCTATAGTGAGTCGTATTATATAGTGAGTCGTATTAGTG  |
| 85WT<br>(template)     | TCCCAGGCGCCCAGGTTCCCCCTCCCCAGCCCGGACCCCGAGCCGGGACCC<br>AGAGAGAGCACCGAGCCTAGTTTCGTGTCATCTCCTATAGTGAGTCGTATTA<br>TATAGTGAGTCGTATTAGTG                              |
| 85MT<br>(template)     | TCTCAGGCGCTCAGGTTCTCCTCTCCAGCTCGGACTCTGAGCCGGGACTCC<br>AGAGAGAGCACCGAGCCTAGTTTCGTGTCATCTCCTATAGTGAGTCGTATTA<br>TATAGTGAGTCGTATTAGTG                              |

|                |                                                      |
|----------------|------------------------------------------------------|
| 95WT           | CATCGGCGGGTCCCAGGCGCCCAGGTTCCCCTCCCCAGCCCGGACCCCGAG  |
| (template)     | CCGGGACCCCAGAGAGAGACACCGAGCCTAGTTCGTGTCATCTCCTATAGTG |
|                | AGTCGTATTATATAGTGA-GTCGTATTAGTG                      |
| 95MT           | CATCGGCGAGTCTCAGGCGCTCAGGTTCTCCTCTCCAGCTCGGACTCTGAG  |
| (template)     | CCGGGACTCCAGAGAGAGACACCGAGCCTAGTTCGTGTCATCTCCTATAGTG |
|                | AGTCGTATTATATAGTGA-GTCGTATTAGTG                      |
| T7 promoter    | CACTAATACGACTCACTATATAATACGACTCACTATAGG              |
| (non-template) |                                                      |

---

Table S2

Table S2. Human protease genes having G4-forming sequence

| Gene                        | G4-forming sequence (5' → 3') <sup>1</sup>   | Up-stream | $\Delta G_{25}^{\circ 4}$ | Down-stream | $\Delta G_{25}^{\circ 4}$ |
|-----------------------------|----------------------------------------------|-----------|---------------------------|-------------|---------------------------|
| <i>CAPN2</i>                | GGGCCGAGGGGATGGCCGGGAAGGACGGG                | 20        | -17.1                     | 17          | -14.8                     |
| <i>CAPN9</i>                | GGGTGATCCGGGCGTCTTGGGAACCGGG                 | 14        | -13.7                     | 16          | -14.2                     |
| <i>CAPN10</i>               | GGGAGGGATCCTGGGAAGCTCTGGGATCCTGGGG           | 20        | -15.0                     | 14          | -16.3                     |
| <i>CTSA</i>                 | GGGATGTACAGGCTCTGGGAAGGGGG                   | 14        | -9.6                      | 16          | -14.9                     |
| <i>CTSD</i>                 | GGGTGTGTGTGGAGGGGCCGCTGGGCCAGGGG             | 19        | -16.8                     | 14          | -15.8                     |
| <i>Furin</i> <sup>2</sup>   | GGGGGCATGGGGCCGAGACGGGCAGGGCTCGGGAGGG        | 6         | -11.4                     | 19          | -18.5                     |
| <i>Furin</i> <sup>2</sup>   | GGGACTTGGGCCCTGACGGGAGAGGCGGG                | 10        | -11.9                     | 17          | -12.5                     |
| <i>Furin</i> <sup>2</sup>   | GGGCCAGGGCAGCCAGGAGGAGCAGGG                  | 12        | -10.4                     | 23          | -13.0                     |
| <i>Furin</i> <sup>2</sup>   | GGGCAGGGGGATGGGAGAGGAGGGGCCACCCCTGGG         | 7         | -13.0                     | 19          | -17.4                     |
| <i>MMP3</i>                 | GGGTACCAGGGGGGTCTCAGGGGAGTCAGGGGG            | 7         | -9.3                      | 12          | -14.6                     |
| <i>MMP19</i> <sup>2</sup>   | GGGCTGCCCGGGCTGTGTGGGGTGAAGGGTGGAGGG         | 12        | -9.6                      | 12          | -11.6                     |
| <i>MMP19</i> <sup>2</sup>   | GGGGCCATGAGGGCCTGGGAATATCGGG                 | 17        | -18.4                     | 14          | -12.4                     |
| <i>MMP19</i> <sup>2</sup>   | GGGACTGGGTTCTGTGGGCACTGGGGGCACAGTGGG         | 19        | -6.0                      | 17          | -15.8                     |
| <i>TPSB2</i> <sup>2</sup>   | GGGACGGGGGGACCGGGGTGGG                       | 14        | -16.6                     | 8           | -7.9                      |
| <i>TPSB2</i> <sup>2</sup>   | GGGCCTGGCCGGGCCCTCACAGGGCAGGGCTGGGGG         | 6         | -16.1                     | 12          | -16.5                     |
| <i>TPSB2</i> <sup>2</sup>   | GGGAGTGGGGGTGGGGGGCGGGGGCGGGGGACAGG<br>CGGGG | 20        | -14.5                     | 16          | -12.4                     |
| <i>TPSB2</i> <sup>2</sup>   | GGGCAGGGGAGGGCCGGAGGG                        | 10        | -8.9                      | 16          | -10.2                     |
| <i>ADAM12</i>               | GGGCGGGGCGGGGGACACGGGCAGCGGG                 | 21        | -25.1                     | 17          | -19.3                     |
| <i>MMP15</i> <sup>2</sup>   | GGGGGTGAAGGGCGGCCGGGCCACGTCGGGCCATCG<br>GGGG | 18        | -25.0                     | 27          | -22.1                     |
| <i>MMP15</i> <sup>2</sup>   | GGGCGGGGCAGACAGGGTGTGTGAGGGCTGAGAGGGG        | 18        | -17.9                     | 9           | -7.9                      |
| <i>MMP15</i> <sup>2</sup>   | GGGCCCCAAGGGGAGGTGGGAGCTGGGGG                | 13        | -15.2                     | 12          | -12.8                     |
| <i>MMP17</i>                | GGGGGCTCTGGGCGGGGTAGCCGGGG                   | 14        | -9.0                      | 19          | -18.0                     |
| <i>MMP25</i> <sup>2</sup>   | GGGCCTGGGCAGGGTGGGG                          | 12        | -8.1                      | 16          | -7.1                      |
| <i>MMP25</i> <sup>2</sup>   | GGGGGTGCTTTGGGGGGCCTGGGGGCGCGGGG             | 15        | -15.1                     | 16          | -11.4                     |
| <i>MMP25</i> <sup>2</sup>   | GGGAAGGGGTCTTGGGGATAGAAGGG                   | 12        | -12.1                     | 11          | -6.9                      |
| <i>TMPRSS2</i> <sup>2</sup> | GGGCGGGGCAGGGGGCATCGGCCGGG                   | 27        | -19.0                     | 27          | -17.0                     |
| <i>TMPRSS2</i> <sup>2</sup> | GGGGCGTACTGGGGCACGGGGGACGGG                  | 12        | -11.0                     | 13          | -13.8                     |
| <i>TMPRSS5</i> <sup>2</sup> | GGGGCAGGGAGGGAGAGGGCAGAAGGG                  | 21        | -16.3                     | 18          | -12.3                     |
| <i>TMPRSS6</i> <sup>2</sup> | GGGCAGAGGGGGCGGGATCGGGG                      | 11        | -10.5                     | 9           | -8.9                      |

|                            |                                                        |    |       |    |       |
|----------------------------|--------------------------------------------------------|----|-------|----|-------|
| <i>TMPRSS6<sup>2</sup></i> | GGGGAAGGGGAGAGGCTGGGTAGGG                              | 12 | -12.0 | 7  | -4.0  |
| <i>TMPRSS6<sup>2</sup></i> | GGGAATCAGGGCATGGGACGGG                                 | 5  | -4.2  | 9  | -6.1  |
| <i>TMPRSS6<sup>2</sup></i> | GGGCCCCAGGGGAGGGGGTATATGGGGAGGG                        | 16 | -18.1 | 17 | -18.8 |
| <i>TMPRSS6<sup>2</sup></i> | GGGCTGGGCAGGGGAGCCGGGTGGGG                             | 20 | -13.0 | 16 | -17.8 |
| <i>TMPRSS6<sup>2</sup></i> | GGGCTGGGGTCTGGGAGGGGAGTGGCAGGGAGGG                     | 9  | -9.3  | 15 | -13.2 |
| <i>TMPRSS6<sup>2</sup></i> | GGGTGCCAAGGGGAGAGGGCAGGGAGGGGGTGAGGGG<br>CAGAGGGGAGGGG | 9  | -9.0  | 18 | -12.8 |
| <i>TMPRSS6<sup>2</sup></i> | GGGCAGGTGGGCAGGCAGGGTGGGG                              | 9  | -9.6  | 18 | -9.3  |
| <i>TMPRSS6<sup>2</sup></i> | GGGCACCTGGGAGGGAGGAGCGGG                               | 16 | -19.8 | 15 | -9.39 |
| <i>TMPRSS6<sup>2</sup></i> | GGGAAGAGAGGGAGGGGGAGGG                                 | 7  | -8.6  | 9  | -4.1  |
| <i>TMPRSS6<sup>2</sup></i> | GGGATGGGCAGGGAGAGGGGATGCGCGGGCGGG                      | 18 | -13.0 | 8  | -9.7  |
| <i>TMPRSS6<sup>2</sup></i> | GGGTGGATGGGTGGGTGGGTAGATGGGTGGG                        | 5  | -2.4  | 2  | 0.3   |
| <i>TMPRSS6<sup>2</sup></i> | GGGACAGAGGGGATGGGGCAGGG                                | 13 | -10.2 | 19 | -12.0 |
| <i>TMPRSS6<sup>2</sup></i> | GGGTCCTAGTGGGGAGCGGGTGGG                               | 9  | -11.7 | 14 | -9.7  |
| <i>TMPRSS6<sup>2</sup></i> | GGGGTGGGGTGGGGTGGGGTGGGGTGGGG                          | 14 | -12.6 | 19 | -14.5 |
| <i>TMPRSS6<sup>2</sup></i> | GGGCTGGGTGTGGGCCTGGGTCTCAGGGG                          | 22 | -12.2 | 4  | -5.7  |
| <i>TMPRSS9</i>             | GGGGGGAGACATGGGAAGGGGCTGGG                             | 14 | -9.5  | 13 | -13.1 |
| <i>ADAM9<sup>3</sup></i>   |                                                        |    |       |    |       |
| <i>ADAM10<sup>3</sup></i>  |                                                        |    |       |    |       |
| <i>ADAM17<sup>3</sup></i>  |                                                        |    |       |    |       |
| <i>CAPN1<sup>3</sup></i>   |                                                        |    |       |    |       |
| <i>CAPN3<sup>3</sup></i>   |                                                        |    |       |    |       |
| <i>CAPN6<sup>3</sup></i>   |                                                        |    |       |    |       |
| <i>CAPN7<sup>3</sup></i>   |                                                        |    |       |    |       |
| <i>CAPN11<sup>3</sup></i>  |                                                        |    |       |    |       |
| <i>CAPN12<sup>3</sup></i>  |                                                        |    |       |    |       |
| <i>CASP1<sup>3</sup></i>   |                                                        |    |       |    |       |
| <i>CASP2<sup>3</sup></i>   |                                                        |    |       |    |       |
| <i>CASP3<sup>3</sup></i>   |                                                        |    |       |    |       |
| <i>CASP4<sup>3</sup></i>   |                                                        |    |       |    |       |
| <i>CASP6<sup>3</sup></i>   |                                                        |    |       |    |       |
| <i>CASP7<sup>3</sup></i>   |                                                        |    |       |    |       |
| <i>CASP8<sup>3</sup></i>   |                                                        |    |       |    |       |
| <i>CASP9<sup>3</sup></i>   |                                                        |    |       |    |       |
| <i>CASP10<sup>3</sup></i>  |                                                        |    |       |    |       |

|                               |  |  |  |  |  |
|-------------------------------|--|--|--|--|--|
| <i>CASP12</i> <sup>3</sup>    |  |  |  |  |  |
| <i>CELA3A</i> <sup>3</sup>    |  |  |  |  |  |
| <i>CELA3B</i> <sup>3</sup>    |  |  |  |  |  |
| <i>CTRC</i> <sup>3</sup>      |  |  |  |  |  |
| <i>CTSB</i> <sup>3</sup>      |  |  |  |  |  |
| <i>CTSK</i> <sup>3</sup>      |  |  |  |  |  |
| <i>CTSV</i> <sup>3</sup>      |  |  |  |  |  |
| <i>MMP1</i> <sup>3</sup>      |  |  |  |  |  |
| <i>MMP7</i> <sup>3</sup>      |  |  |  |  |  |
| <i>MMP8</i> <sup>3</sup>      |  |  |  |  |  |
| <i>MMP10</i> <sup>3</sup>     |  |  |  |  |  |
| <i>MMP12</i> <sup>3</sup>     |  |  |  |  |  |
| <i>MMP13</i> <sup>3</sup>     |  |  |  |  |  |
| <i>MMP16</i> <sup>3</sup>     |  |  |  |  |  |
| <i>MMP20</i> <sup>3</sup>     |  |  |  |  |  |
| <i>MMP24</i> <sup>3</sup>     |  |  |  |  |  |
| <i>PLG</i> <sup>3</sup>       |  |  |  |  |  |
| <i>PRSS1</i> <sup>3</sup>     |  |  |  |  |  |
| <i>TMPRSS1</i> <sup>3</sup>   |  |  |  |  |  |
| <i>TMPRSS3</i> <sup>3</sup>   |  |  |  |  |  |
| <i>TMPRSS4</i> <sup>3</sup>   |  |  |  |  |  |
| <i>TMPRSS7</i> <sup>3</sup>   |  |  |  |  |  |
| <i>TMPRSS11D</i> <sup>3</sup> |  |  |  |  |  |
| <i>TMPRSS12</i> <sup>3</sup>  |  |  |  |  |  |
| <i>TMPRSS13</i> <sup>3</sup>  |  |  |  |  |  |

<sup>1</sup>G4 forming G-rich sequence ( $G_{<2}X_{1\sim7}G_{<2}X_{1\sim7}G_{<2}X_{1\sim7}G_{<2}$ ) identified by our sequence analysis for 60 human protease genes.

<sup>2</sup>These genes have multiple G4-forming sequences.

<sup>3</sup>These genes do not have the G4-forming sequence.

<sup>4</sup>Values of  $\Delta G^0_{25}$  (kcal/mol) evaluated by m-fold (2) for the hairpin loop structure of oligonucleotides involving the G4-forming sequence and the upstream or the downstream sequence with 50 nucleotide long.

Figure S1

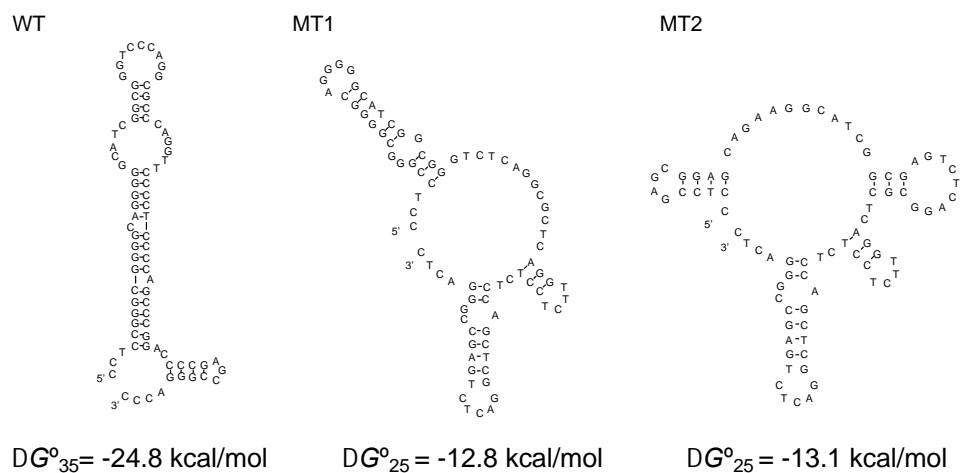

Fig S1. Possible structures and their thermodynamic stability at 25 °C for WT, MT1 and MT2. These structures were predicted using m-fold (2).

Figure S2

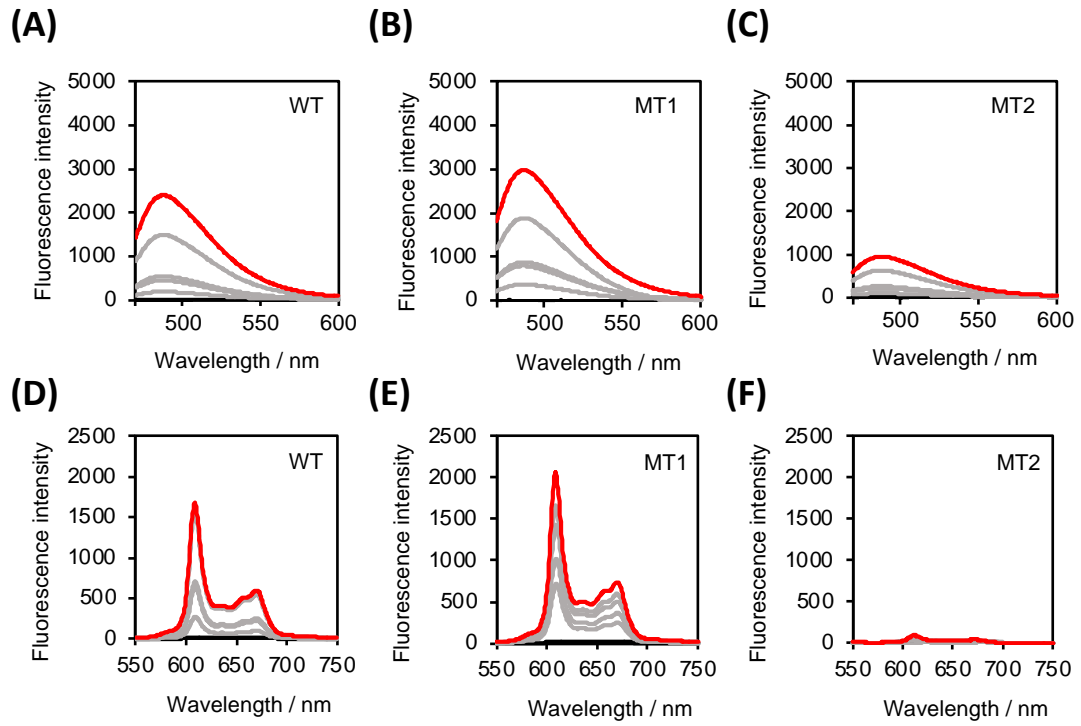

Fig. S2 Fluorescence spectra for 1  $\mu$ M ThT (A-C), or 1  $\mu$ M NMM (D-F) in the presence of 0-30  $\mu$ M WT, MT1, MT2 DNA oligonucleotides in buffer containing 150 mM KCl, 40 mM Tris-HCl (pH 7.2 at 37°C), and 8 mM  $\text{MgCl}_2$ . ThT: Ex = 450 nm, Em = 470-600 nm. NMM: Ex = 399 nm, Em = 550-750 nm.

Figure S3

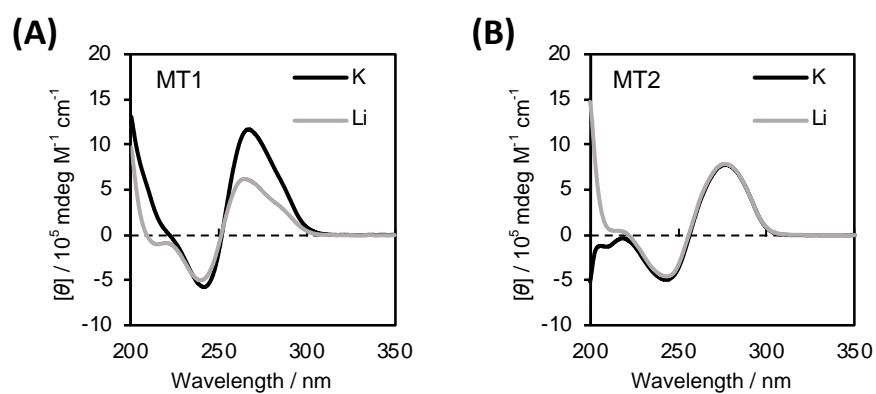

Fig. S3 CD spectra of 20  $\mu\text{M}$  MT1 (A) and MT2 (B) in buffers containing 150 mM KCl (black line) or 150 mM LiCl (gray line), 40 mM Tris-HCl (pH 7.2), and 8 mM  $\text{MgCl}_2$  at 25  $^\circ\text{C}$ .

Figure S4

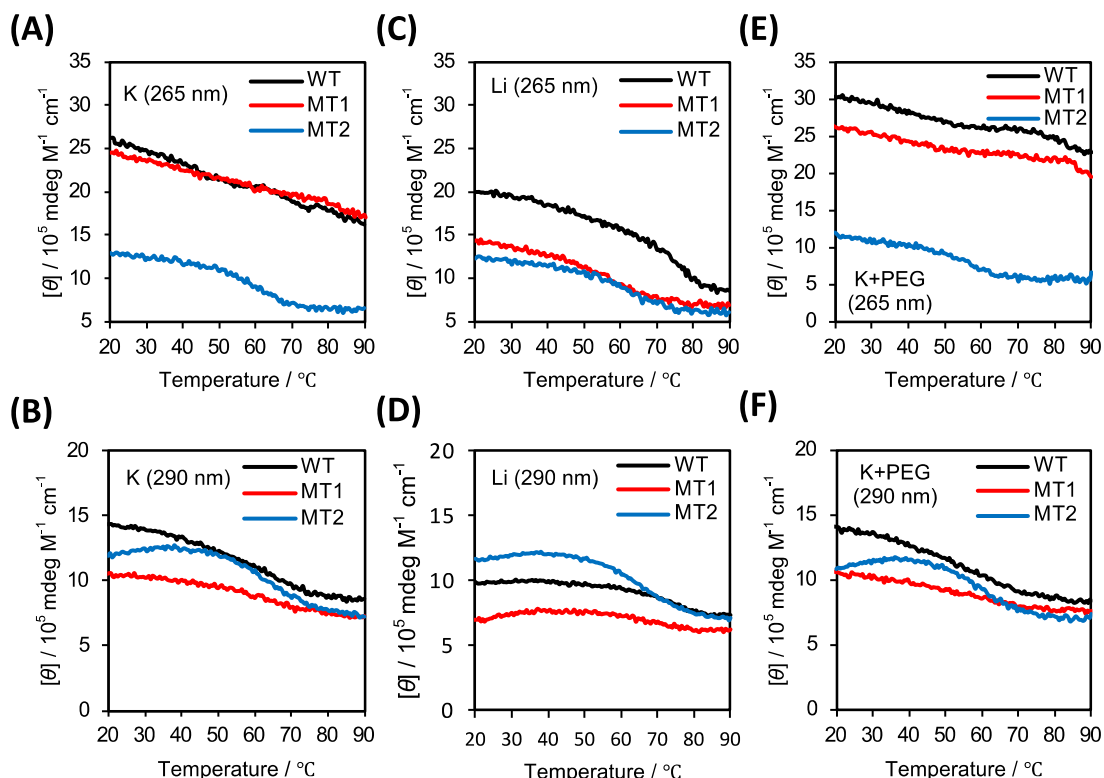

Fig. S4 Thermal denaturing profile traced at 265 nm (A) (C) (E) and 290 nm (B) (D) (F) of 20  $\mu$ M WT (black) or MT1 (red) or MT2 (blue) in buffers containing 150 mM KCl (A) (B) or 150 mM LiCl (C) (D) or 150 mM KCl with 10% PEG200 (E) (F), 40 mM Tris-HCl (pH 7.2), and 8 mM  $\text{MgCl}_2$ .

In the presence of  $\text{K}^+$  at 265 nm, WT did not show denaturation behavior even at 90  $^{\circ}\text{C}$ , indicating that G4 is highly stable. On the other hand, a clear denaturation behavior was observed at 290 nm, showing WT forms two structural components, which could be G4 and hairpin loop with high and modest thermal stabilities, respectively. A similar trend was observed for MT1, while CD intensity at 290 nm was smaller than WT, indicating that lower ratio of G4 in MT1. These results are consistent with the results of the ThT fluorescence intensity.

In the presence of  $\text{Li}^+$  at 265 nm, WT and MT1 showed denaturation behaviors, consistent with that lower stability of G4 in the presence of  $\text{Li}^+$  than  $\text{K}^+$ , indicating that the denaturation curve of WT and MT1 traced at 265 nm reflects thermal denaturation of G4, and thus that the curve traced at 290 nm reflects thermal denaturation of hairpin loop. Denaturation curves of MT2 at both 265 nm and 295 nm showed clear melting behaviors both in the presence of  $\text{K}^+$  and in the presence of  $\text{Li}^+$ , confirming that stability of a structure of MT2, which is hairpin loop, is independent of cation species.

In the presence of  $\text{K}^+$  with PEG200 at 265 nm and 290 nm, WT and MT1 showed similar denaturation

behaviors with ones without PEG200, although CD intensities at 295 nm were higher, showing that G4 was stabilized by molecular crowding with PEG200. MT2 showed similar denaturation curves at both wavelengths with and without PEG200, although the melting behavior with PEG200 was observed at slightly lower temperature than that without PEG200. These results are consistent with the stabilization and destabilization effects of molecular crowding on G4 and hairpin loop, respectively. Therefore, it is reasonable to consider that WT forms G4 and hairpin loop, depending on the surrounding condition, whereas the dominant structures of MT1 and MT2 are G4 and hairpin loop, respectively, almost independent of the surrounding condition. These CD melting profiles of WT, MT1, MT2 were consistent with the results of ThT fluorescence.

**A**

Template DNA

T7 promoter

Linker (35 bp)

X

Temp-WT: AGGGCCGAG GCGAGG CCGA CCGC TTGGA CCGGA CGCTAC GGGGAC GGGC GG CCTTC

Temp-MT1: AGGGCCGAG GCGAGG CCGA CCGC TTGGA CCGGA CGCTAC GGGGAC GGGC GG CCTTC

Temp-MT2: AGGGCCGAG GCGAGG CCGA CCGC TTGGA CCGGA CGCTAC GGGGAC GGGC GG CCTTC

85 nt

95 nt

115 nt

**B**

KCl 150mM

WT MT1 MT2

85 WT 85 MT 95 WT 95 MT

200 nt

150 nt

100 nt

90 nt

80 nt

70 nt

60 nt

50 nt

40 nt

30 nt

Lanes 4 and 5: Transcripts from templates that have the same sequence as Temp-WT (lane 4) or Temp-MT1 (lane 5) but are truncated after the 85th nucleotide. The main bands in lane 4 and lane 5 show the same migration as the third main bands observed with Temp-WT (lane 1) and Temp-MT1 (lane 2), respectively. These results demonstrate that the third bands are products arrested just before the first guanine stretch in Temp-WT and Temp-MT1.

14

Figure S6

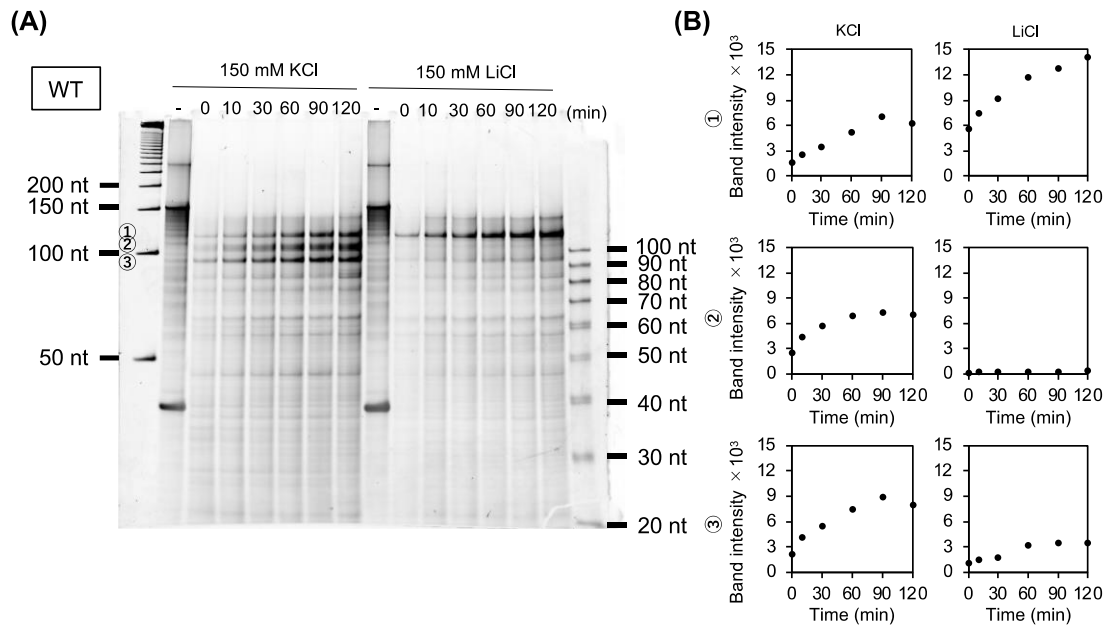

Fig. S6 (A) Transcripts from Temp-WT after a reaction time of 10, 30, 60, 90 or 120 min at 37 °C. The transcription reactions were carried out in the presence of  $K^+$  (left) or  $Li^+$  (right). (B) Intensities of the three main bands after various reaction times in the presence of  $K^+$  (left) or  $Li^+$  (right).

Figure S7

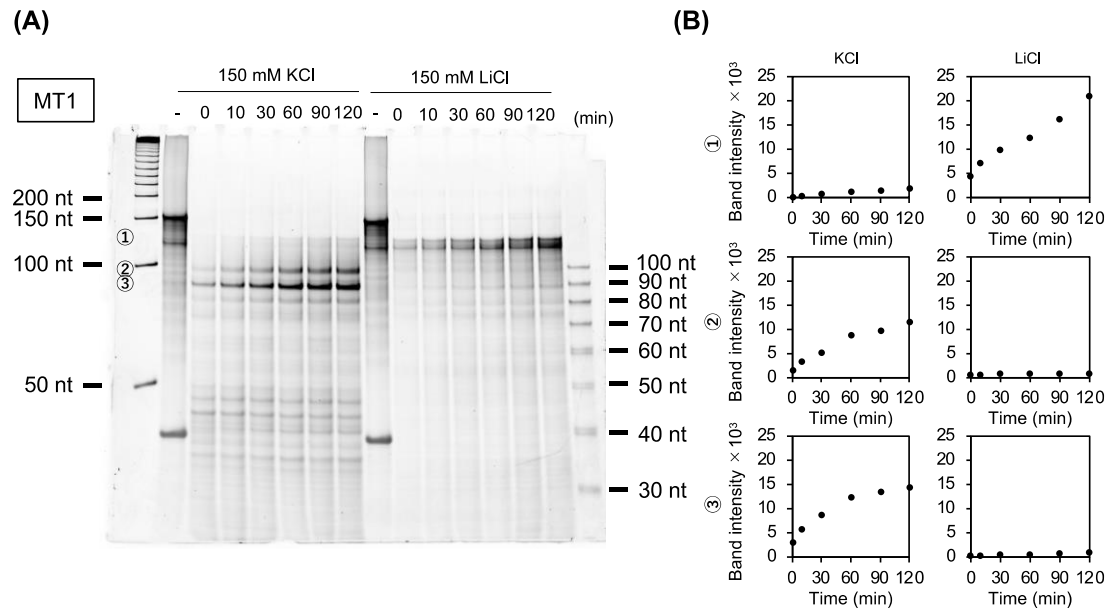

Fig. S7 (A) Transcripts from Temp-MT1 after a reaction time of 10, 30, 60, 90 or 120 min at 37 °C. The transcription reactions were carried out in the presence of  $K^+$  (left) or  $Li^+$  (right). (B) Intensities of the three main bands after various reaction times in the presence of  $K^+$  (left) or  $Li^+$  (right).

Figure S8

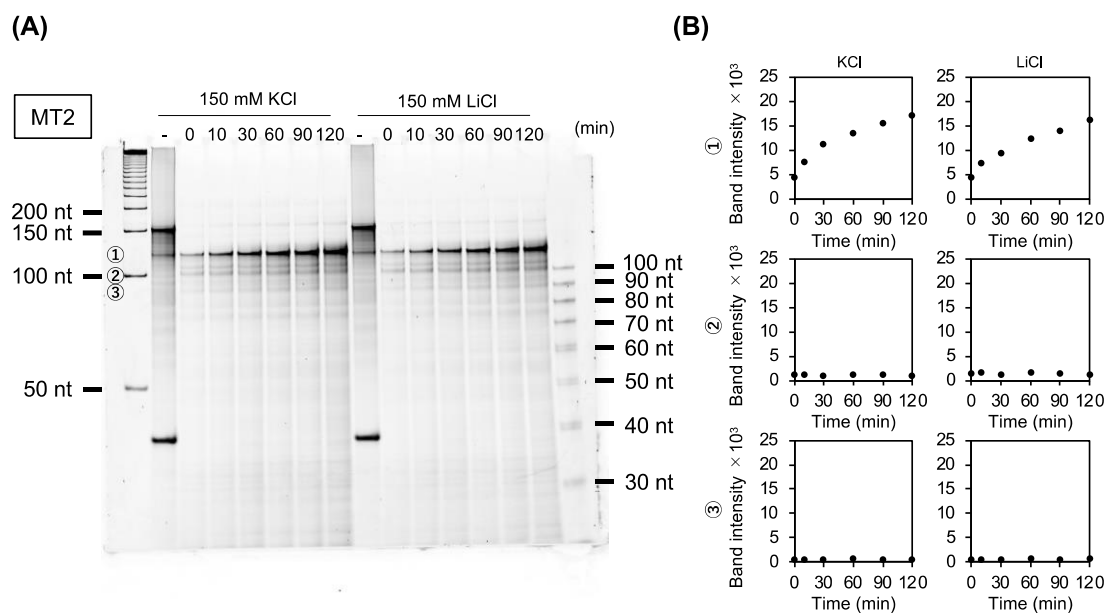

Fig. S8 (A) Transcripts from Temp-MT2 after a reaction time of 10, 30, 60, 90 or 120 min at 37 °C. The transcription reactions were carried out in the presence of K<sup>+</sup> (left) or Li<sup>+</sup> (right). (B) Intensities of the three main bands after various reaction times in the presence of K<sup>+</sup> (left) or Li<sup>+</sup> (right).

**(A)**

TMPRSS2

+1 +78 +94 +209

Exon1 Exon2

3' +98 5' +177

WT : CCCAGGGCCGAG CCCAGG CCCGA CCCCT CCCCTTGGAC CCCGCGGA CCC TGGCGGCTAC GGGGGAC GGGGC GGG CCTCC  
MT1 : CCCAGGGCCGAG CCCAGG CCCGA CCCCT CCCCTTGGAC CCCGCGGA CCC TGGCGGCTAC GGGGGAC GGGGC GGG CCTCC  
MT2 : CCCAGGGCCGAG CCCAGG CCCGA CCCCT CCCCTTGGAC CCCGCGGA CCC TGGCGGCTAC GGGAAAC GAGGC GAG CCTCC  
MT3 : CCCAGGGCCGAG CCCAGG CCCGA CCCCT CCCCTTGGAC CCCGCGGA CCC TGGCGACTAC GCGCGAC GCGCG AGA CCTCC  
MT4 : CCCAGGGCCGAG CCCAGC CCCGA CCCCT CCCCTTGGAC CCCGCGGA CCC TGGCGCTAC GCGCGAC GCGCG GCG GCTCC

**(B)**

WT

MT1

MT2

MT3

MT4

**(C)**

WT

MT3

MT4

$DG^{\circ}_{35} = -24.8 \text{ kcal/mol}$

$DG^{\circ}_{25} = -24.3 \text{ kcal/mol}$

$DG^{\circ}_{25} = -29.0 \text{ kcal/mol}$

18

Figure S10

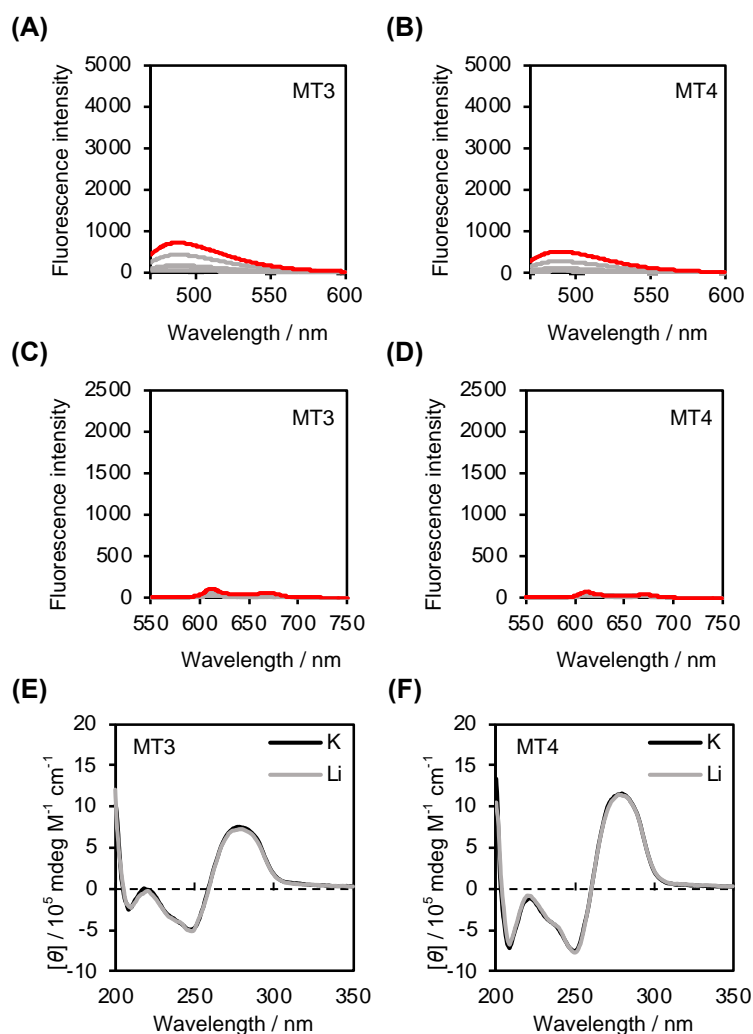

Fig. S10 Fluorescence spectra for 1  $\mu\text{M}$  ThT (A, B), or 1  $\mu\text{M}$  NMM (C, D) in the presence of 0-30  $\mu\text{M}$  MT3, MT4 DNA oligonucleotides in the buffer containing 150 mM KCl, 40 mM Tris-HCl (pH 7.2), and 8 mM  $\text{MgCl}_2$ . ThT:  $\text{Ex} = 450 \text{ nm}$ ,  $\text{Em} = 470\text{-}600 \text{ nm}$ , NMM:  $\text{Ex} = 399 \text{ nm}$ ,  $\text{Em} = 550\text{-}750 \text{ nm}$ . CD spectra of 20  $\mu\text{M}$  MT3 or MT4 in the buffers containing 150 mM KCl (black line) or 150 mM LiCl (gray line), 40 mM Tris-HCl (pH 7.2), and 8 mM  $\text{MgCl}_2$  (E, F). All measurements were carried out at 37°C.

Figure S11

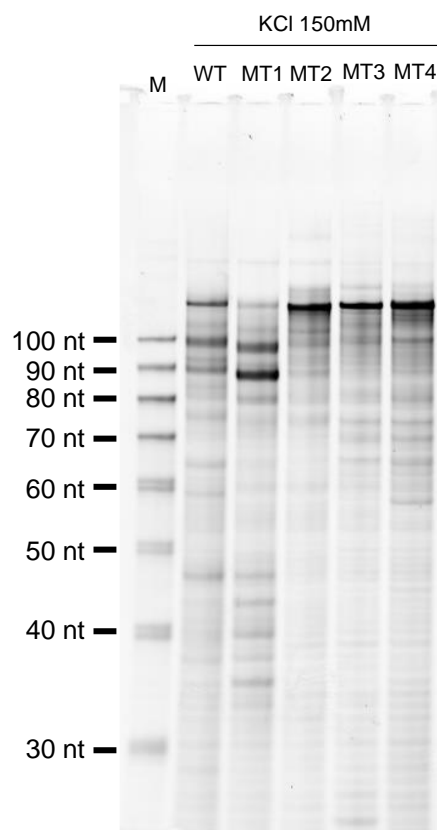

Fig. S11 Transcript production from Temp-WT, Temp-MT1, Temp-MT2, Temp-MT3, Temp-MT4 and transcriptional length marker (M). Reaction mixtures contains 100 units T7 polymerase, 2.5  $\mu$ M DNA template in the buffer of 150 mM KCl, 40 mM Tris-HCl (pH 7.2), 8 mM  $\text{MgCl}_2$ . Denaturing gel electrophoresis were carried out at 70°C of transcription reaction products after 120 min at 37°C.

Figure S12

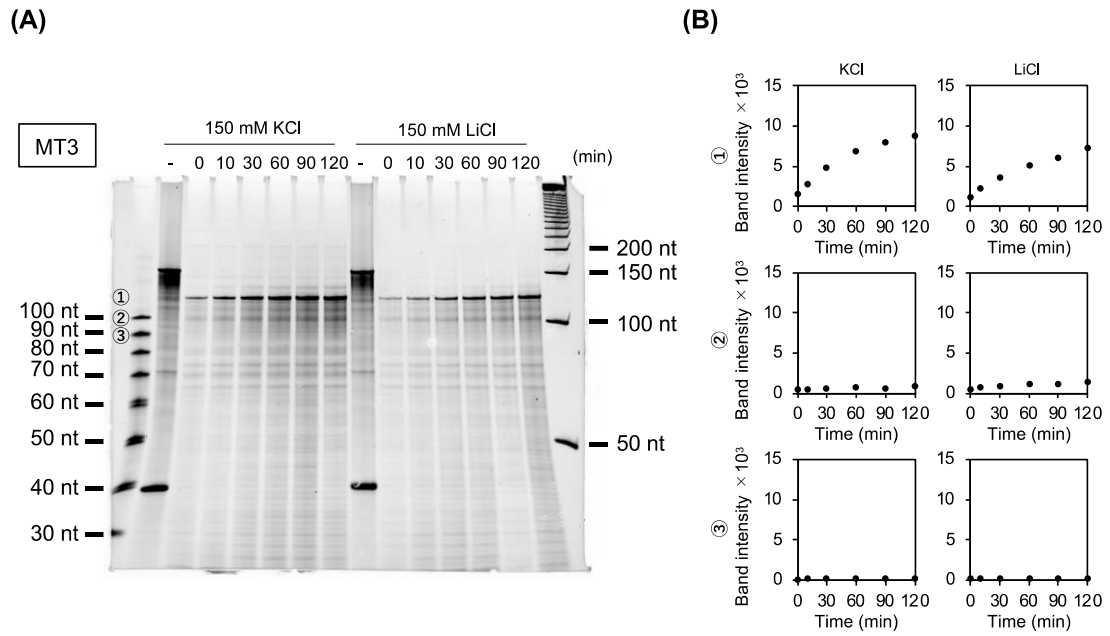

Fig. S12 (A) Transcripts from Temp-MT3 after a reaction time of 10, 30, 60, 90 or 120 min at 37 °C. The transcription reactions were carried out in the presence of  $K^+$  (left) or  $Li^+$  (right). (B) Intensities of the three main bands after various reaction times in the presence of  $K^+$  (left) or  $Li^+$  (right).

Figure S13

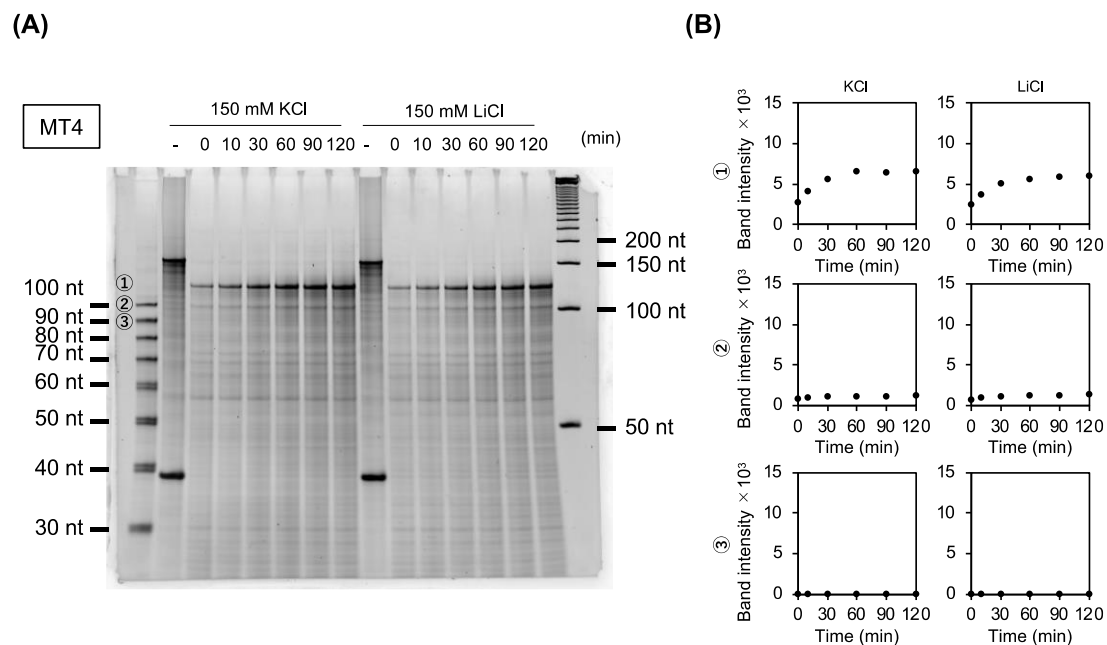

Fig. S13 (A) Transcripts from Temp-MT4 after a reaction time of 10, 30, 60, 90 or 120 min at 37 °C. The transcription reactions were carried out in the presence of  $K^+$  (left) or  $Li^+$  (right). (B) Intensities of the three main bands after various reaction times in the presence of  $K^+$  (left) or  $Li^+$  (right).

Figure S14

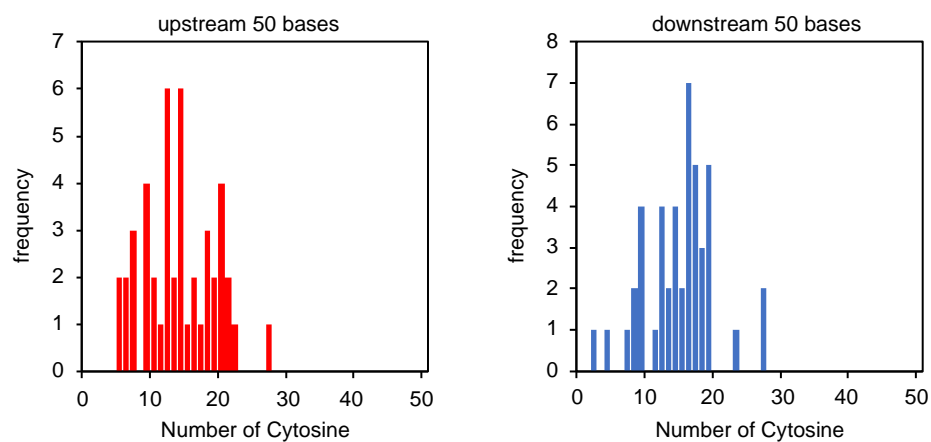

Fig. S14 The numbers of cytosine bases in the upstream (A) and in the downstream (B) 50 bases region from the putative quadruplex G4-forming sequence observed in the 62 human proteases.

## References

1. N. Sigimoto, M. Nakano, S. Nakano, *Biochemistry* 2000, 39, 11270-11281.
2. M. Zuker, *Nucleic Acids Res.*, 2003, 31, 3406-3415.
